# Supplementary material for: Genome-wide Analysis of NPF, NRT2, CLC and SLAC1/SLAH Nitrate Transporters in Hexaploid Wheat (Triticum Aestivum)
Source: Research Square preprint supplement (doi:10.21203/rs.3.rs-907654/v1), 2021-09-21
Supplement: Supplementary file 1 [file a64f1a28a1738ad523a8ed83.docx]

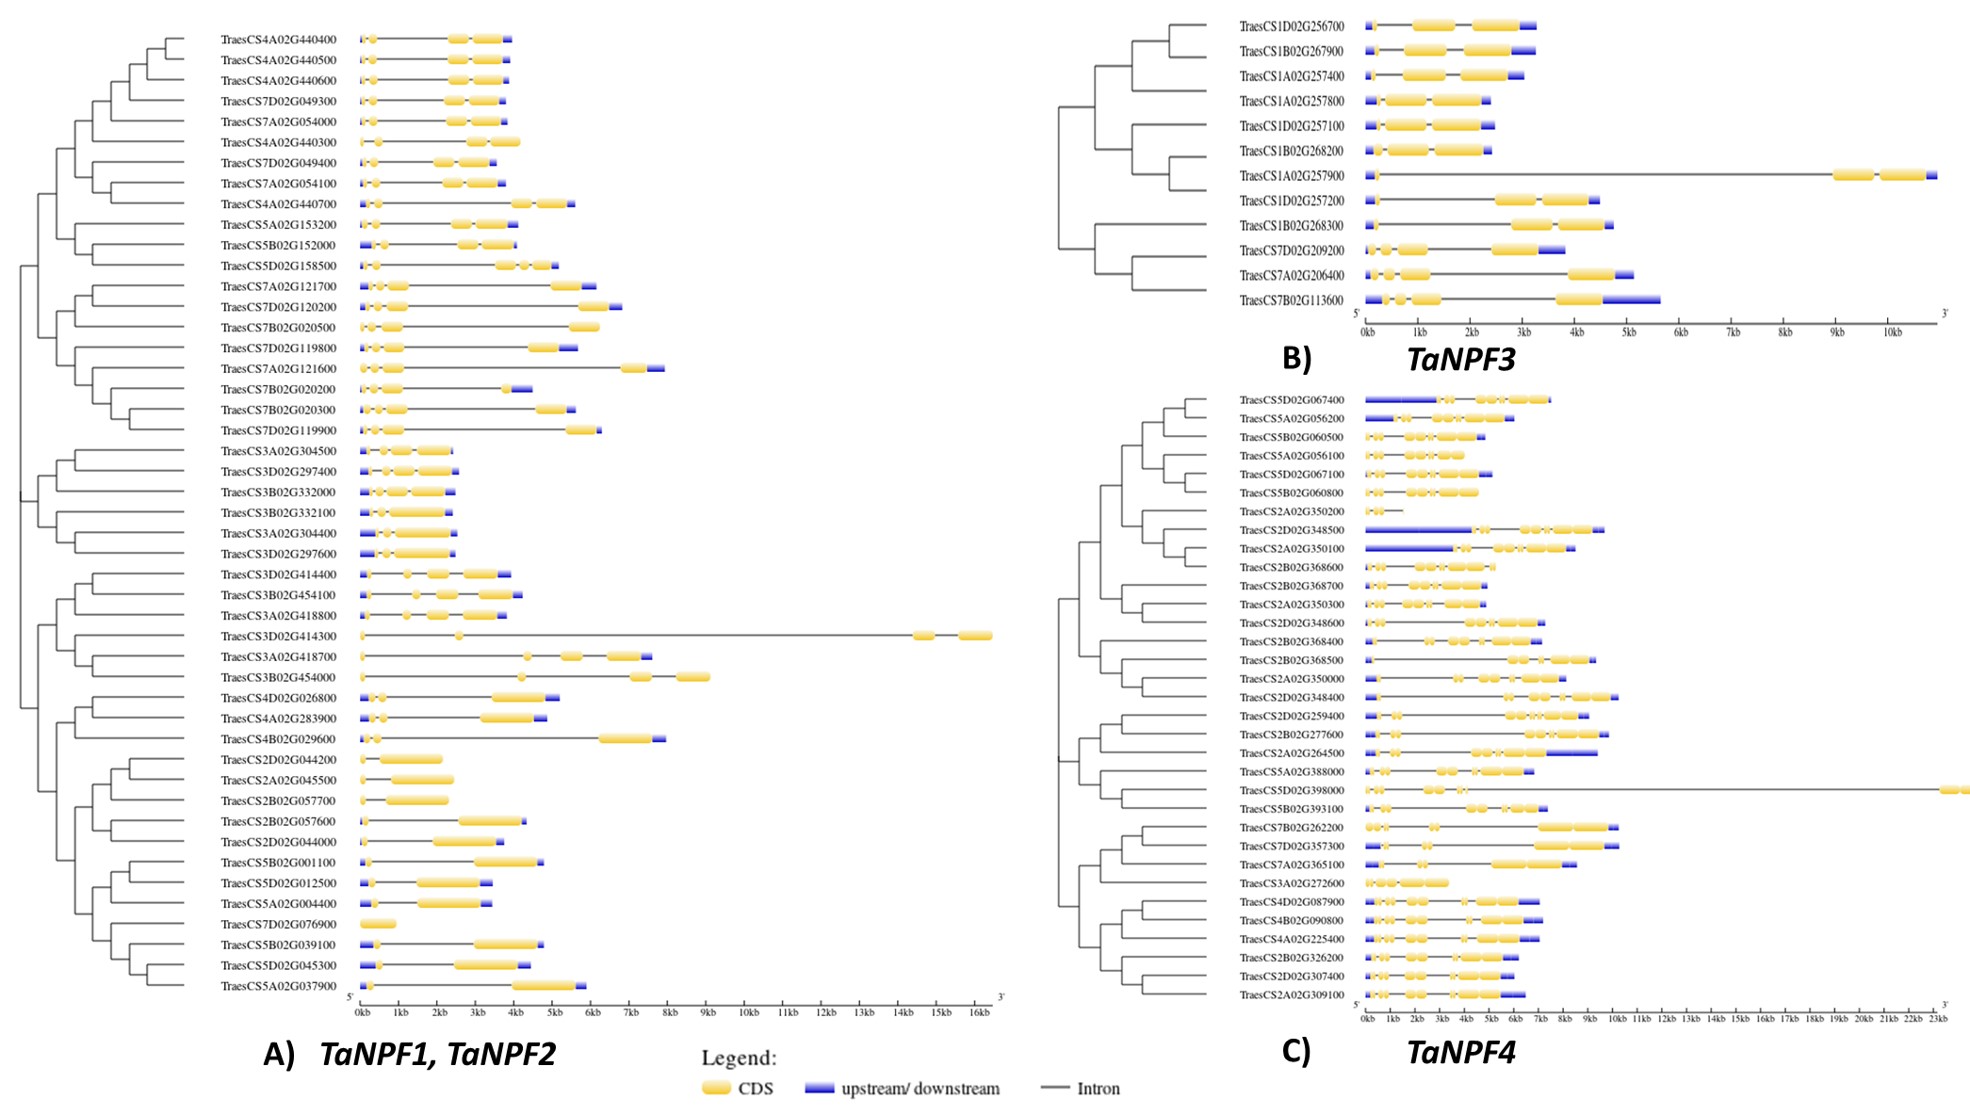


**Supplementary Figure S1a** Gene structures of nitrate transporter genes. **A-** *TaNPF1, TaNPF2,* **B-** *TaNPF3* **C**- *TaNPF4*


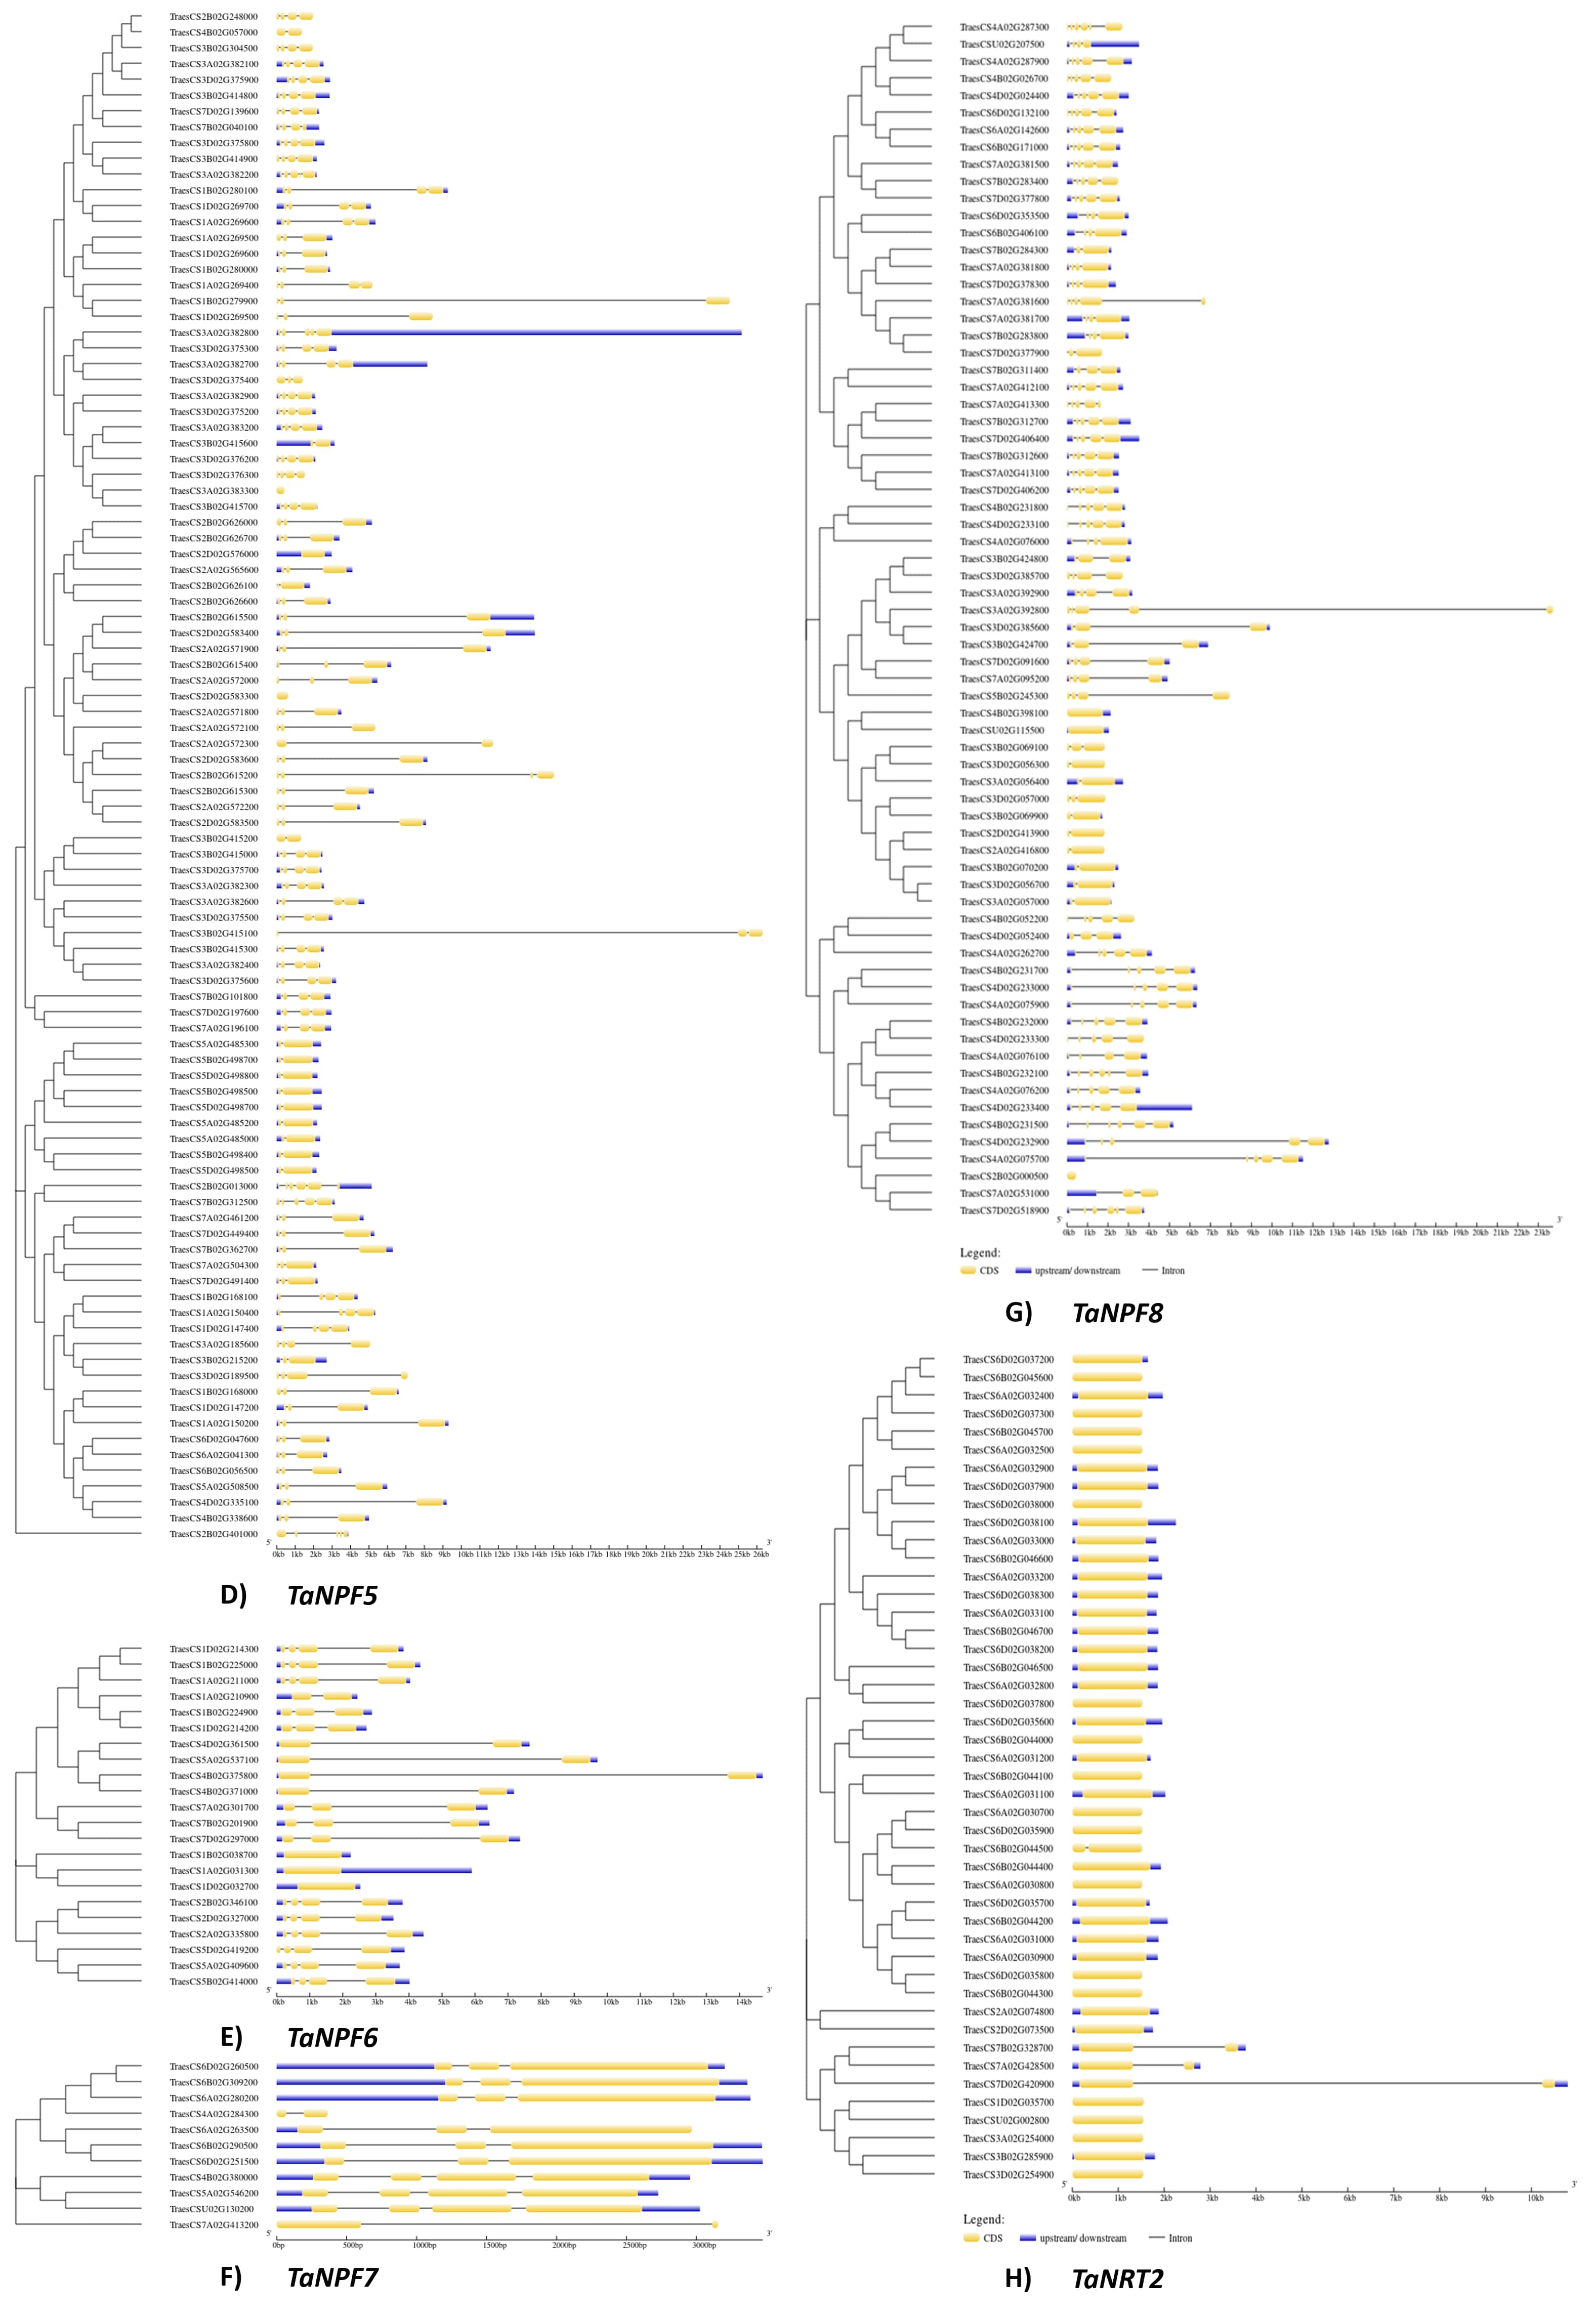


**Supplementary Figure S1b** Gene structures of nitrate transporter genes. **D-** *TaNPF5,* **E-** *TaNPF6* **F**- *TaNPF7,* **G-** *TaNPF8,*  **H-** *TaNRT2.*


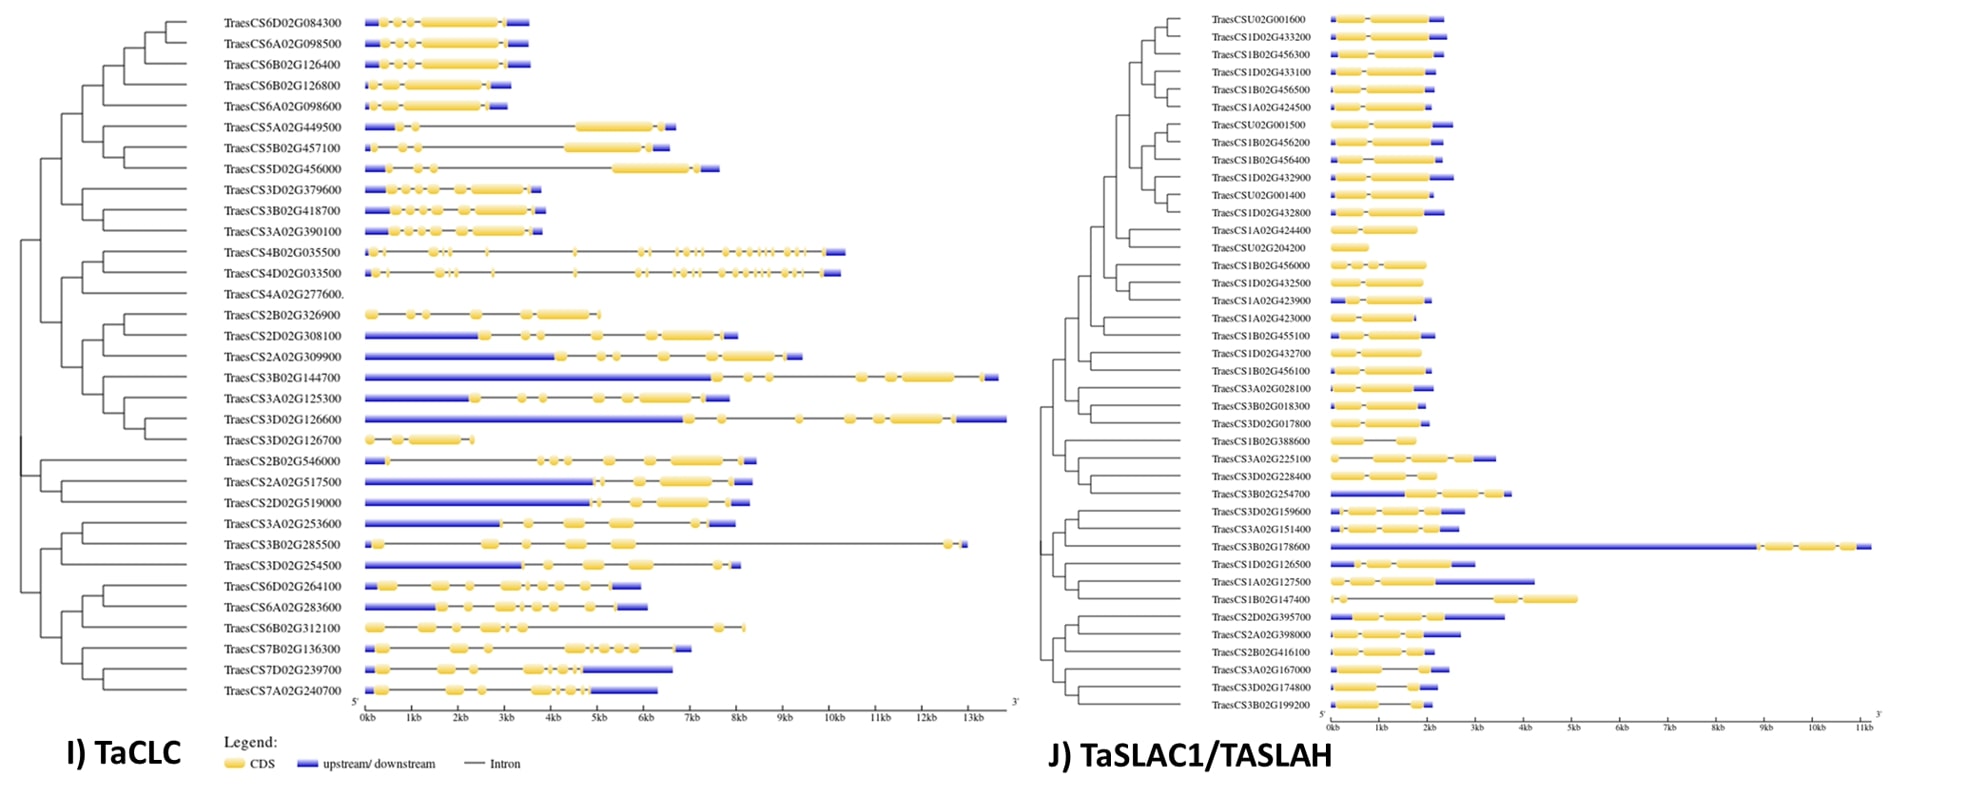


**Supplementary Figure S1c** Gene structures of nitrate transporter genes. **I**-*TaCLC*, **K**- *TaSLAC/TaSLAH.*


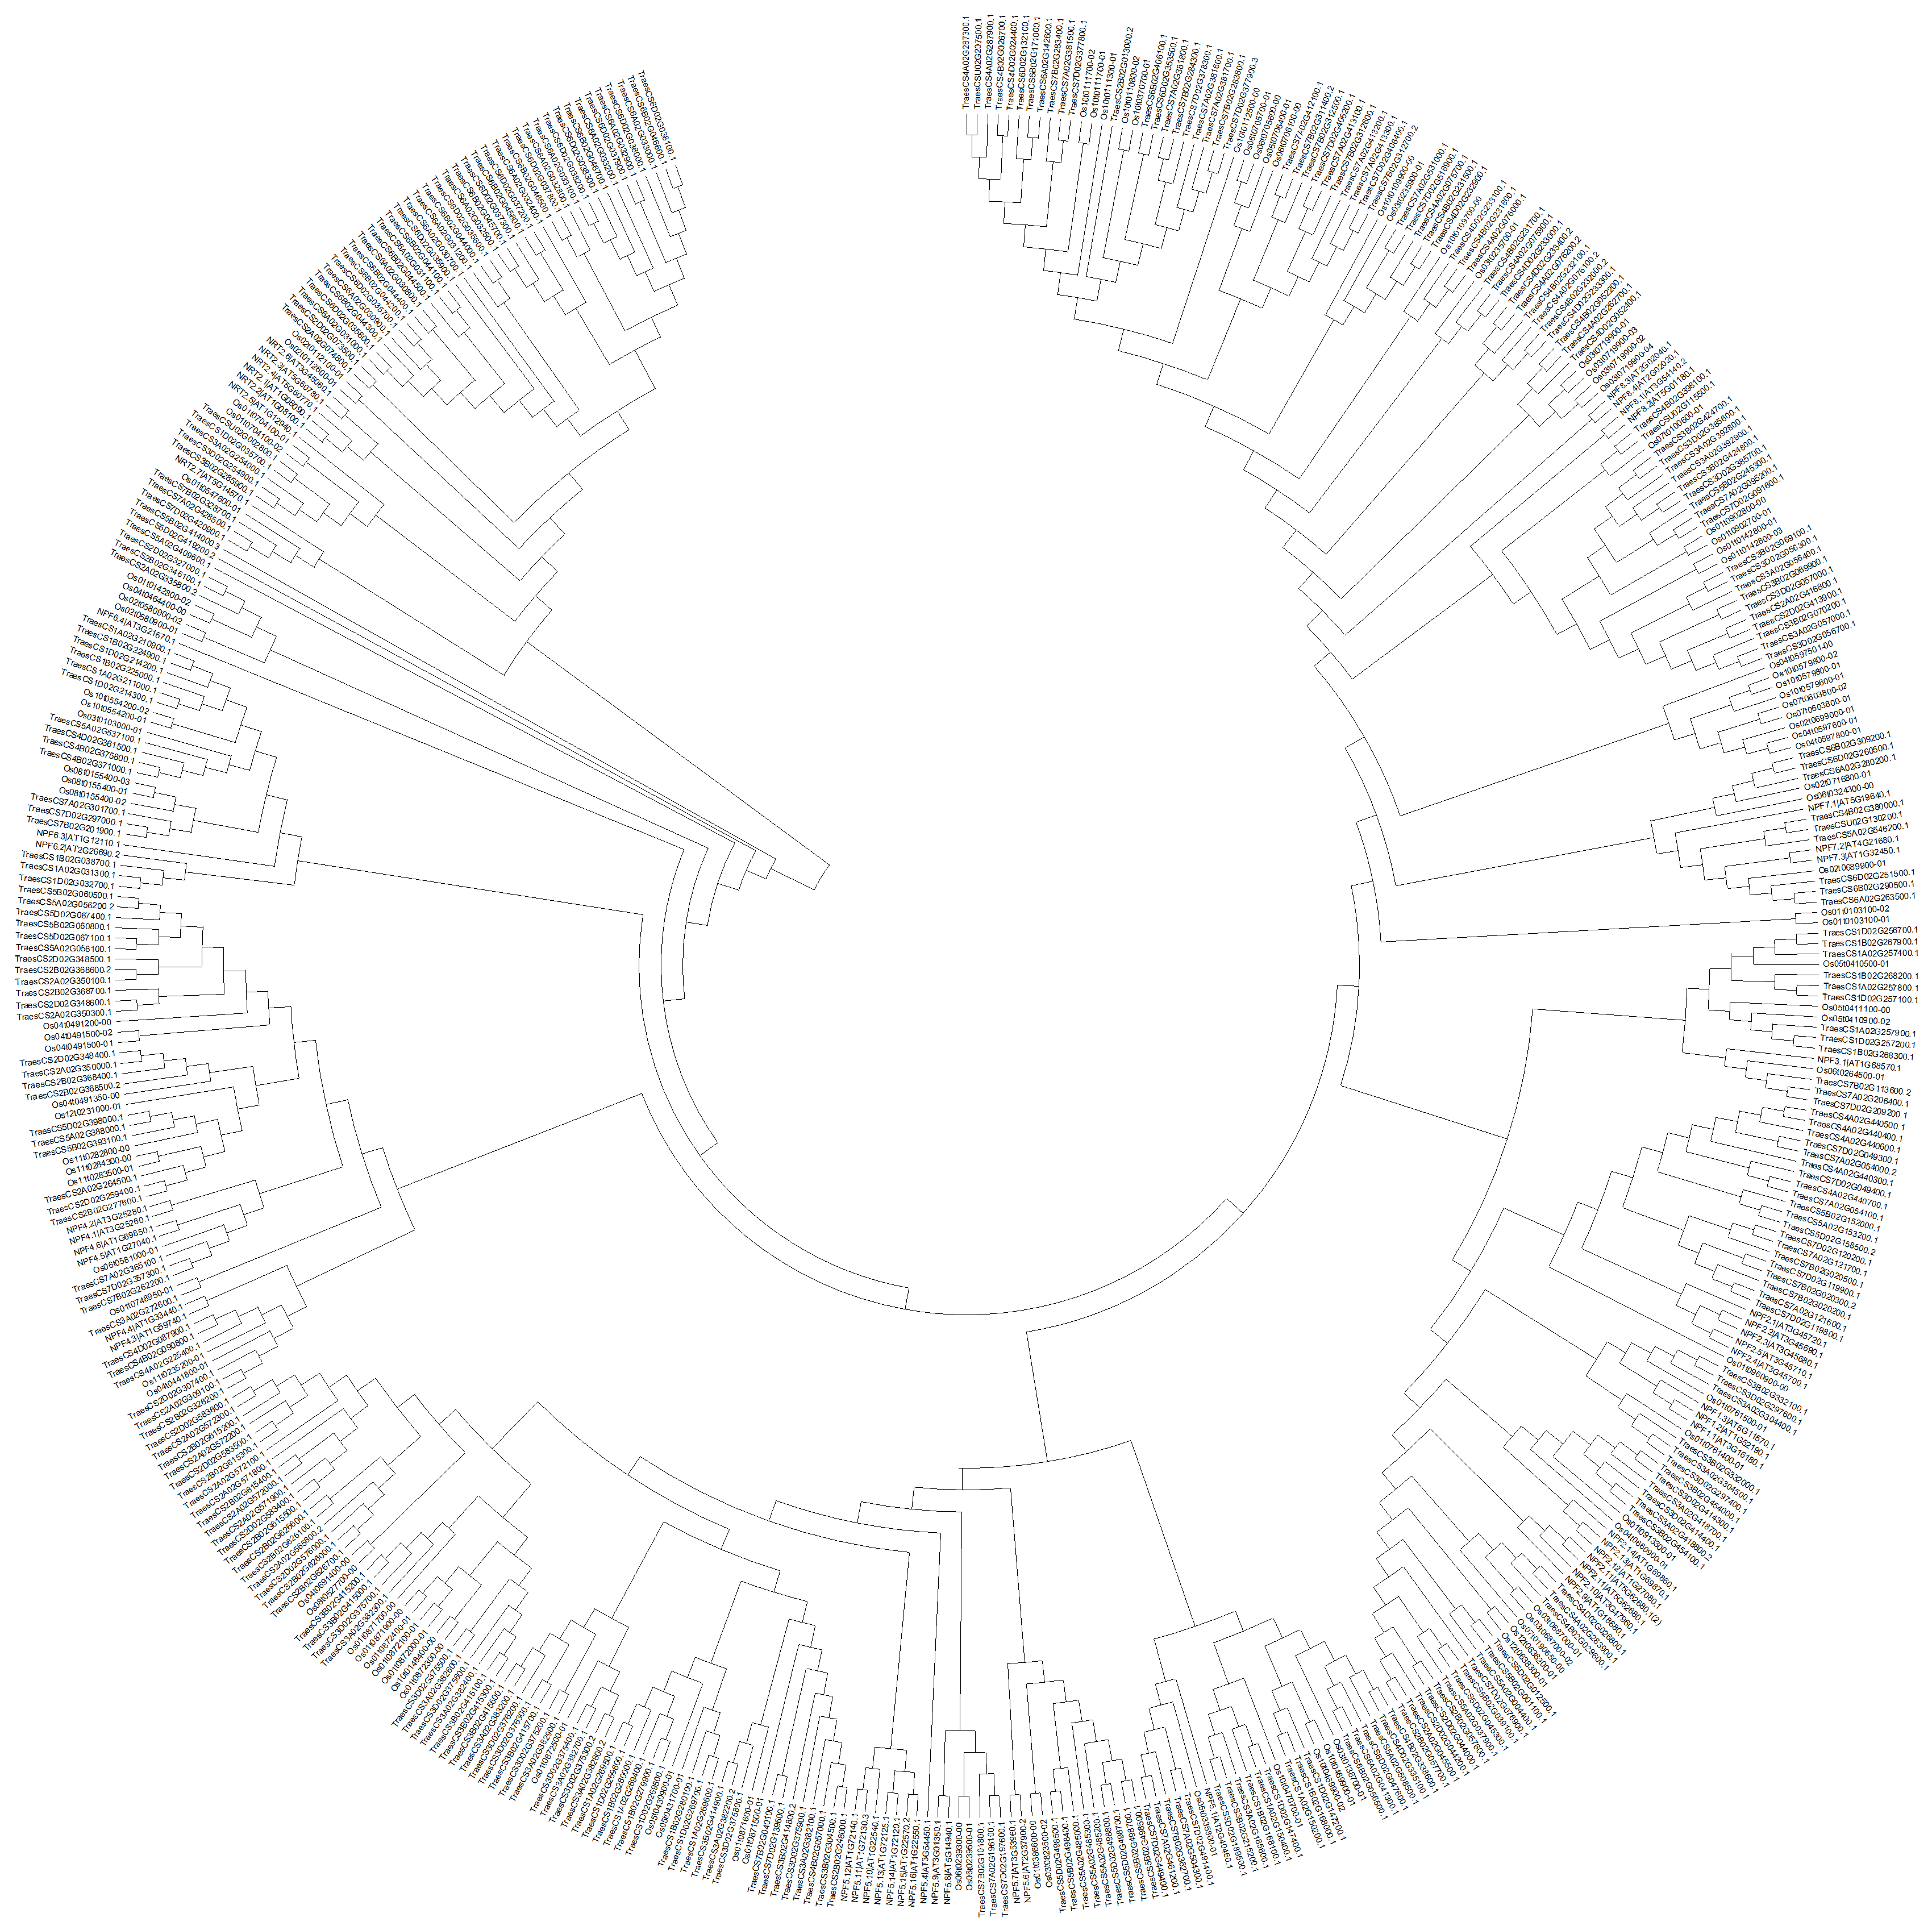


**Supplementary Figure S2** Phylogenetic relationship of wheat NPF and NRT2 genes with Arabidopsis and rice nitrate transporter genes


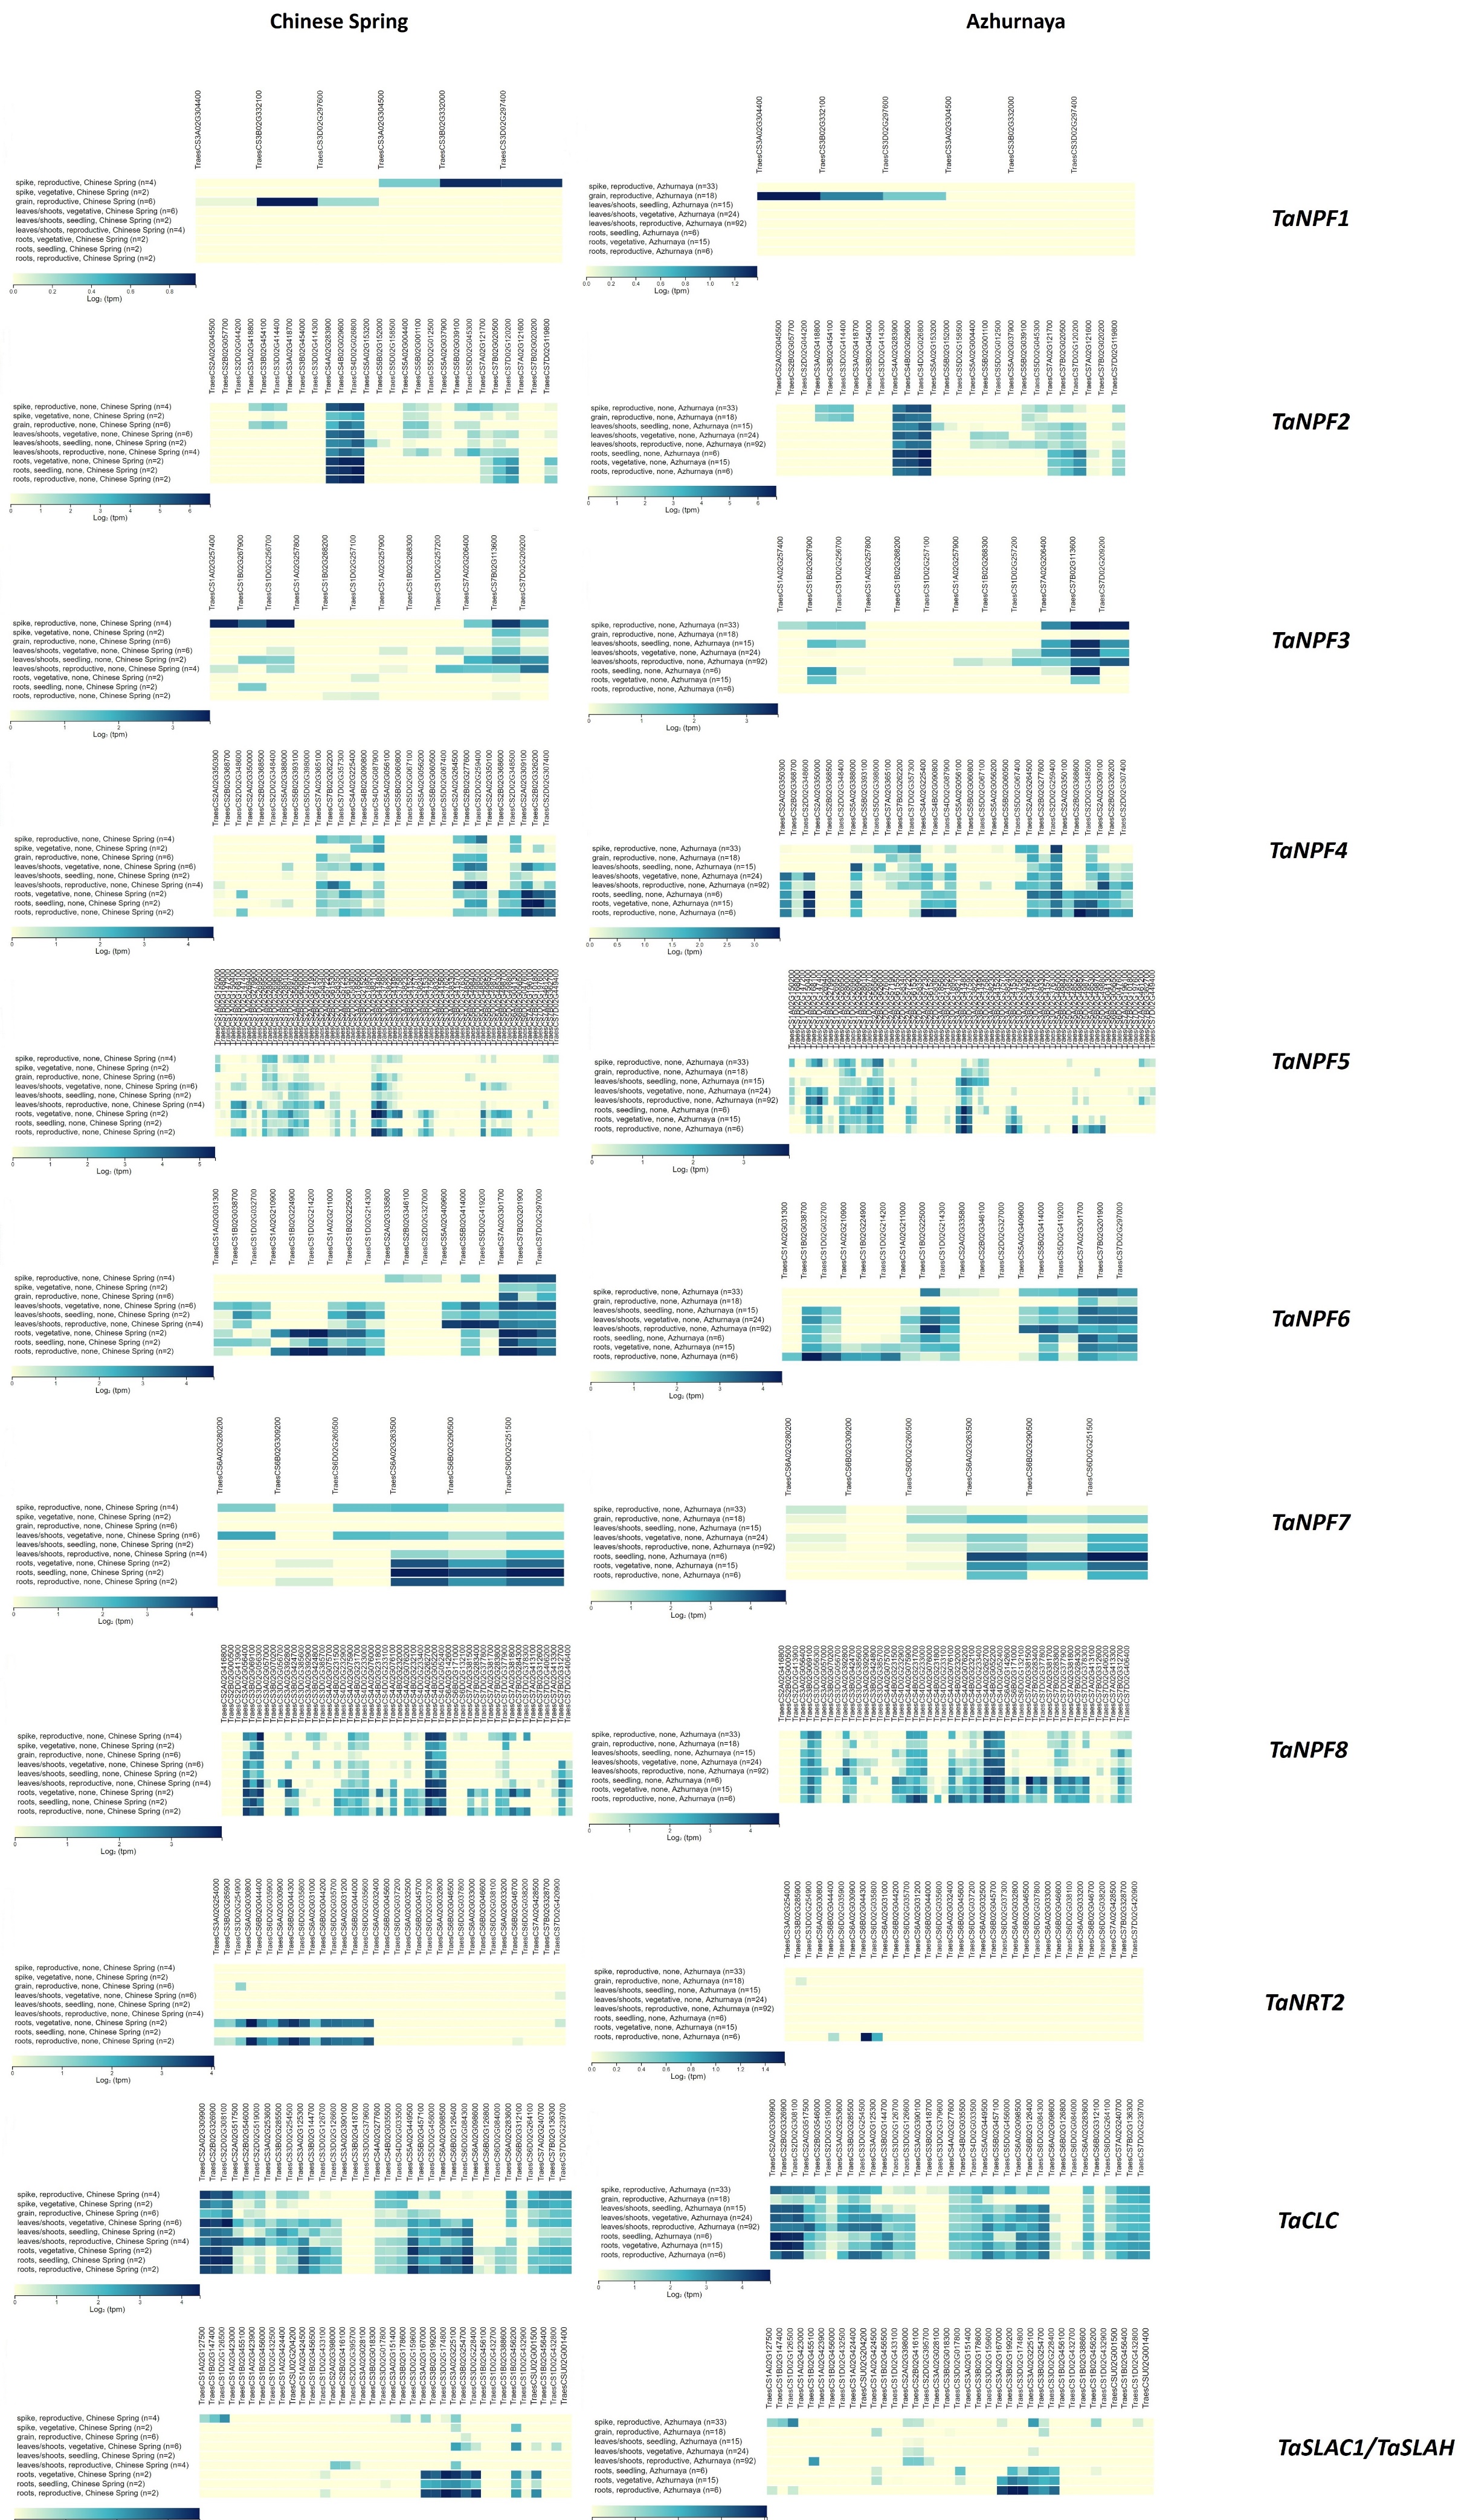


**Figure S3** Expression patterns of all nitrate transporter genes in developmental stages of Chinese spring and Azhurnaya


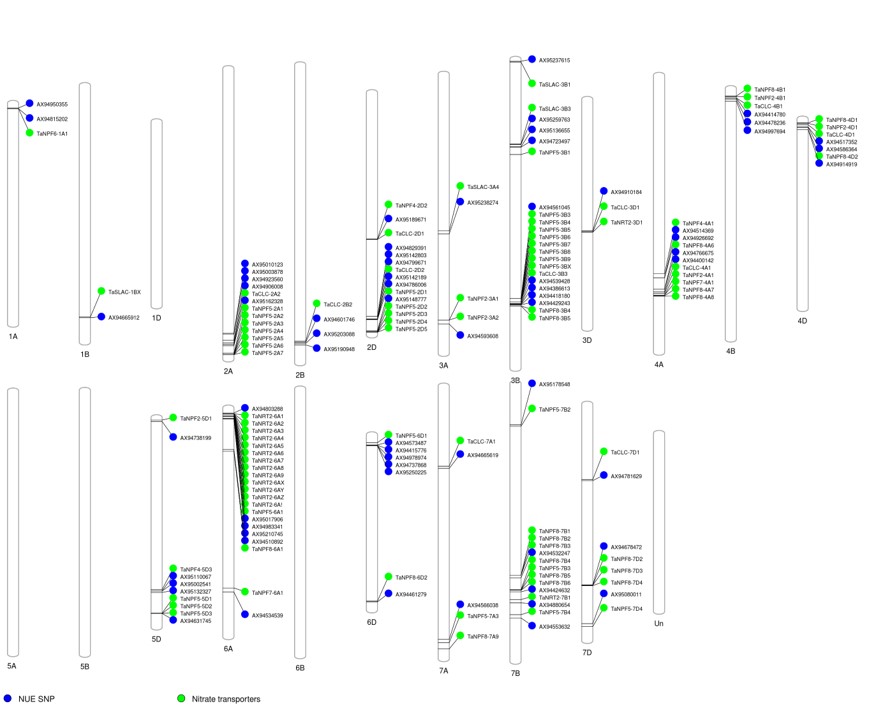


**Figure S4** Proximity of nitrogen use efficiency (NUE) linked SNPs to nitrate transporters detected in this study
